# Supplementary material for: Enhanced low-temperature ionic conductivity via different Li+ solvated clusters in organic solvent/ionic liquid mixed electrolytes
Source: Royal Society of Chemistry journal article supplement (doi:10.1039/c6cp04766a), 2016-01-01
Supplement: c6cp04766a1.pdf [file c6cp04766a1.pdf]

## Enhanced low-temperature ionic conductivity via different Li<sup>+</sup> solvated clusters in organic solvent/ionic liquid mixed electrolytes

Luis Aguilera, Johan Scheers and Aleksandar Matic.  
Department of Physics, Chalmers University of Technology, 412 96, Göteborg, Sweden.

### Supplementary information

**Table S1.** Glass transition temperature ( $T_g$ ) of the 0.8m LiTFSI [EC:DMC(1:1)]<sub>(1-x)</sub>[Pyr<sub>14</sub>TFSI]<sub>x</sub> mixtures.

| 0.8m LiTFSI in [EC:DMC] <sub>(1-x)</sub> [Pyr <sub>14</sub> -TFSI] <sub>x</sub> |            |
|---------------------------------------------------------------------------------|------------|
| wt fraction (x)                                                                 | $T_g$ (°C) |
| x=0                                                                             | -104       |
| x=0.19                                                                          | -102       |
| x=0.33                                                                          | -97        |
| x=0.46                                                                          | -93        |
| x=0.56                                                                          | -91        |
| x=0.76                                                                          | -83        |
| x=1                                                                             | -67        |

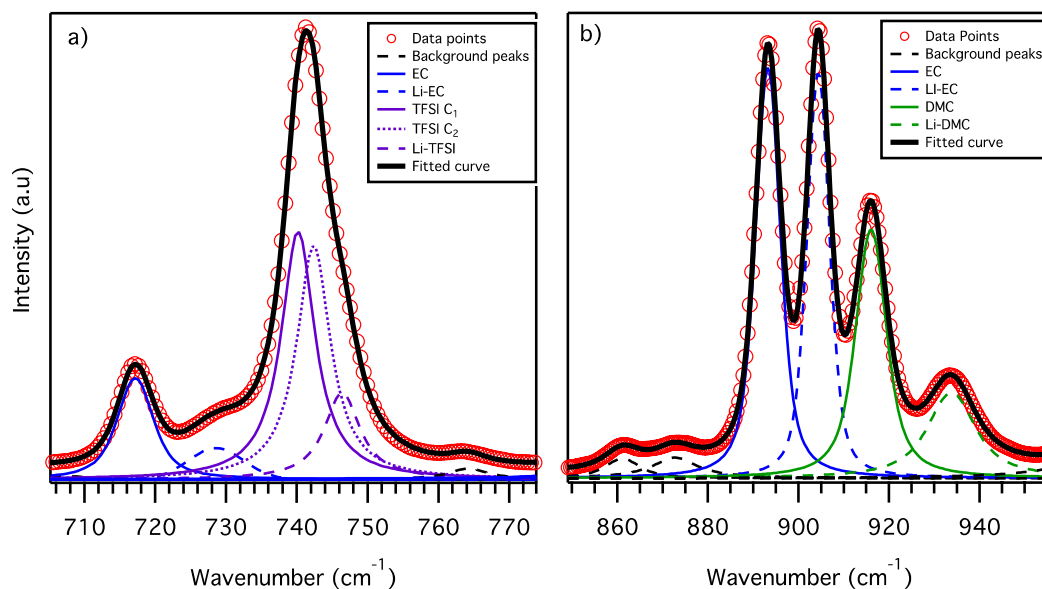

**Figure S1.** Example of peak assignment and fitted Raman spectra of the two regions of interest a) from 700 to 800 cm<sup>-1</sup> where TFSI solvation features are studied and b) from 850 to 950 cm<sup>-1</sup> where information about the organic solvent is present. The spectra correspond to an IL fraction of x=0.46.

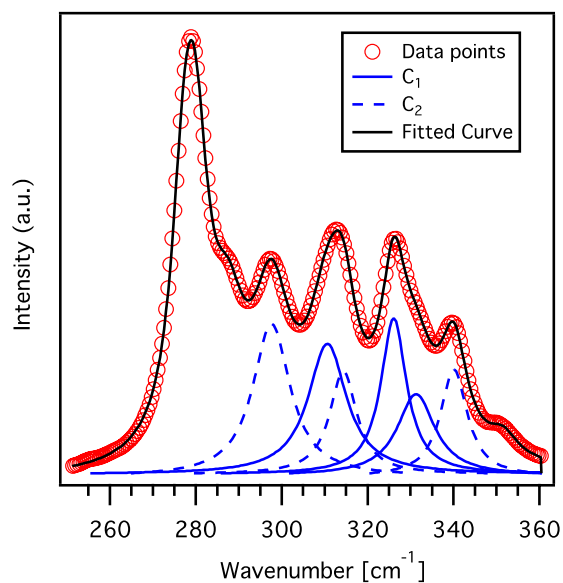

**Figure S2.** Peak assignment and fitted Raman spectra used to determine the population of the  $C_1$  and  $C_2$  conformers from the TFSI<sup>-</sup>. The spectra correspond to to an IL fraction of  $x=0.46$ .

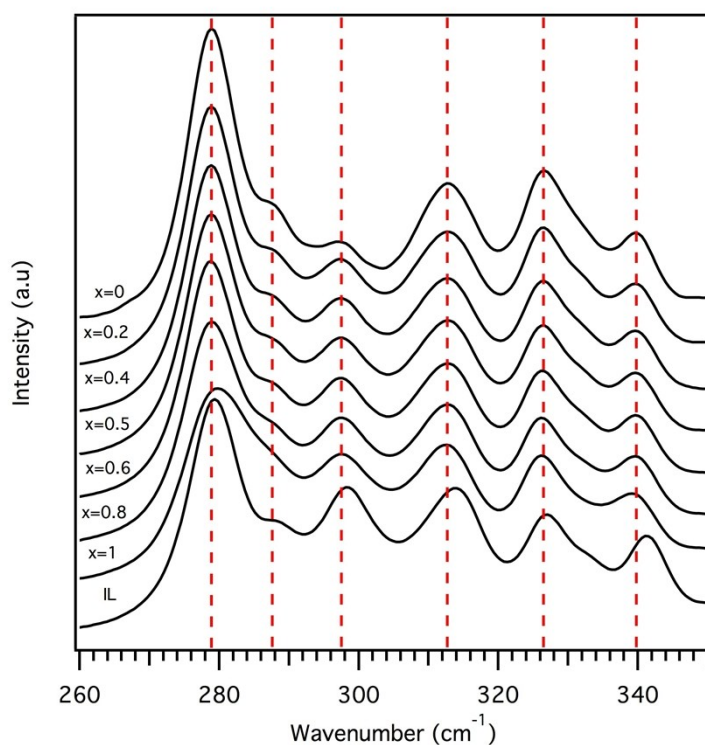

**Figure S3.** Evolution of the peaks representing the conformers population of the TFSI<sup>-</sup>, for 0.8m LiTFSI in  $[\text{EC}:\text{DMC}]_{(1-x)}/[\text{Pyr}_{14}\text{-TFSI}]_x$  mixtures. The spectra have been normalized with respect to intensity and offset vertically for clarity.
